# Supplementary material for: Influence of Storage Conditions on Stability of Phenolic Compounds and Antioxidant Activity Values in Nutraceutical Mixtures with Edible Flowers as New Dietary Supplements
Source: MDPI journal article supplement (doi:10.3390/antiox12040962), 2023-04-19
Supplement: s1 [file s1]

## Supplementary material

# Influence of Storage Conditions on Stability of Phenolic Compounds and Antioxidant Activity Values in Nutraceutical Mixtures with Edible Flowers as New Dietary Supplements

Martina Mrázková <sup>1</sup>, Daniela Sumczynski <sup>1,\*</sup> and Jana Orsavová <sup>2</sup>

<sup>1</sup> Tomas Bata University in Zlín, Department of Food Analysis and Chemistry, Vavrečkova 5669, 760 01 Zlín, Czech Republic

<sup>2</sup> Tomas Bata University in Zlín, Language Centre, Štefánikova 5670, 760 01 Zlín, Czech Republic

\* Correspondence: sumczynski@utb.cz

**Table S1.** Basic chemical analyses.

|         | S                          | D                        | L                        | T                         | S                      |
|---------|----------------------------|--------------------------|--------------------------|---------------------------|------------------------|
| Samples | Dry matter (%)             |                          |                          |                           | Ash (%)                |
| M1      | 91.5±0.14 <sup>a,A</sup>   | 91.5±0.10 <sup>a,A</sup> | 91.6±0.11 <sup>a,A</sup> | 94.1±0.18 <sup>a,B</sup>  | 2.29±0.01 <sup>a</sup> |
| M2      | 91.5±0.15 <sup>a,A,C</sup> | 91.8±0.13 <sup>b,A</sup> | 91.2±0.12 <sup>b,C</sup> | 94.1 ±0.14 <sup>a,D</sup> | 2.30±0.03 <sup>a</sup> |
| M3      | 90.5±0.24 <sup>b,A</sup>   | 91.1±0.10 <sup>c,B</sup> | 90.2±0.18 <sup>c,A</sup> | 92.9±0.16 <sup>c,C</sup>  | 2.55±0.03 <sup>b</sup> |
| M4      | 91.1±0.11 <sup>c,A,C</sup> | 90.9±0.19 <sup>c,A</sup> | 91.3±0.10 <sup>b,C</sup> | 93.5±0.10 <sup>d,D</sup>  | 2.16±0.01 <sup>c</sup> |

The results are presented as means in dry matter ± SD ( $n=5$ ) (the mean value of five measurements). For each variable and effect, values followed with different letters are significantly different at  $p<0.05$ . S (start of storage experiment), D (storage condition without the presence of sunlight at 23 °C), L (storage condition in the presence of sunlight at 23 °C), T (storage in thermostatic device at 40 °C).

**Table S2.** Individual phenolic content in free phenolic fraction of the nutraceutical mixtures M1 and M2 under defined storage conditions.

| Free phenolics<br>(mg/kg) | M1S                      | M1D                                | M1L                                 | M1T                                | M2S                      | M2D                                | M2L                                | M2T                                |
|---------------------------|--------------------------|------------------------------------|-------------------------------------|------------------------------------|--------------------------|------------------------------------|------------------------------------|------------------------------------|
| E                         | 125±2 <sup>a,A</sup>     | 102±1 <sup>b,A</sup><br>(-18%)     | 95.2±1.2 <sup>c,A</sup><br>(-24%)   | 97.1±0.9 <sup>d,A</sup><br>(-22%)  | 85.5±1.8 <sup>a,B</sup>  | 71.2±2.1 <sup>b,B</sup><br>(-17%)  | 61.7±0.7 <sup>c,B</sup><br>(-28%)  | 64.5±1.4 <sup>d,B</sup><br>(-25%)  |
| C                         | 9.86±0.48 <sup>a,A</sup> | 7.23±0.22 <sup>b,A</sup><br>(-27%) | 6.57±0.21 <sup>c,A</sup><br>(-33%)  | 6.77±0.55 <sup>d,A</sup><br>(-31%) | 43.3±0.5 <sup>a,B</sup>  | 36.2±0.2 <sup>b,B</sup><br>(-16%)  | 28.7±0.4 <sup>c,B</sup><br>(-34%)  | 32.4±1.1 <sup>d,B</sup><br>(-25%)  |
| R                         | 1.25±0.06 <sup>a,A</sup> | 1.03±0.02 <sup>b,A</sup><br>(-18%) | 0.88±0.05 <sup>c,A</sup><br>(-30%)  | 0.92±0.01 <sup>d,A</sup><br>(-26%) | 85.8±0.1 <sup>a,B</sup>  | 72.3±0.3 <sup>b,B</sup><br>(-16%)  | 64.2±0.6 <sup>c,B</sup><br>(-25%)  | 67.2±1.2 <sup>d,B</sup><br>(-57%)  |
| Q                         | 2.46±0.15 <sup>a,A</sup> | 1.78±0.31 <sup>b,A</sup><br>(-28%) | 1.51±0.10 <sup>c,A</sup><br>(-39 %) | 1.62±0.12 <sup>d,A</sup><br>(-34%) | 3.70±0.16 <sup>a,B</sup> | 2.99±0.22 <sup>b,B</sup><br>(-19%) | 2.62±0.16 <sup>c,B</sup><br>(-29%) | 2.74±0.14 <sup>d,B</sup><br>(-26%) |
| NA                        | 64.8±0.5 <sup>a,A</sup>  | 52.7±0.2 <sup>b,A</sup><br>(-19%)  | 45.2±0.4 <sup>c,A</sup><br>(-30%)   | 47.8±0.4 <sup>d,A</sup><br>(-26%)  | 54.3±0.6 <sup>a,B</sup>  | 41.7±0.2 <sup>b,B</sup><br>(-23%)  | 35.1±0.9 <sup>c,B</sup><br>(-35%)  | 37.2±0.8 <sup>d,B</sup><br>(-31%)  |
| GA                        | 8.05±0.46 <sup>a,A</sup> | 6.44±0.31 <sup>b,A</sup><br>(-20%) | 6.03±0.06 <sup>c,A</sup><br>(-25%)  | 6.21±0.54 <sup>d,A</sup><br>(-23%) | 14.9±0.5 <sup>a,B</sup>  | 12.1±0.42 <sup>b,B</sup><br>(-19%) | 9.65±0.4 <sup>c,B</sup><br>(-35%)  | 10.9±0.4 <sup>d,B</sup><br>(-27%)  |
| PA                        | 115±2 <sup>a,A</sup>     | 89.1±1.3 <sup>b,A</sup><br>(-23%)  | 84.1±1.4 <sup>c,A</sup><br>(-27%)   | 86.2±1.1 <sup>d,A</sup><br>(-25%)  | 128±2 <sup>a,B</sup>     | 103±1 <sup>b,B</sup><br>(-20%)     | 96.7±1.2 <sup>c,B</sup><br>(-24%)  | 98.2±1.2 <sup>d,B</sup><br>(-23%)  |
| <i>p</i> -OH-BA           | 2.69±0.14 <sup>a,A</sup> | 1.99±0.22 <sup>b,A</sup><br>(-26%) | 1.81±0.10 <sup>c,A</sup><br>(-33%)  | 1.97±0.10 <sup>b,A</sup><br>(-27%) | 6.14±0.04 <sup>a,B</sup> | 5.07±0.01 <sup>b,B</sup><br>(-17%) | 4.72±0.05 <sup>c,B</sup><br>(-23%) | 4.87±0.04 <sup>d,B</sup><br>(-21%) |
| CA                        | 14.9±0.5 <sup>a,A</sup>  | 11.7±0.2 <sup>b,A</sup><br>(-21%)  | 10.2±0.3 <sup>c,A</sup><br>(-25%)   | 10.9±0.5 <sup>d,A</sup><br>(-27%)  | 26.2±0.3 <sup>a,B</sup>  | 21.7±1.2 <sup>b,B</sup><br>(-17%)  | 19.3±0.2 <sup>c,B</sup><br>(-26%)  | 20.1±0.3 <sup>d,B</sup><br>(-23%)  |
| <i>p</i> -CoA             | 17.0±0.2 <sup>a,A</sup>  | 14.2±0.4 <sup>b,A</sup><br>(-16%)  | 12.8±0.2 <sup>c,A</sup><br>(-25%)   | 13.4±0.4 <sup>d,A</sup><br>(-21%)  | 3.60±0.10 <sup>a,B</sup> | 2.78±0.05 <sup>b,B</sup><br>(-23%) | 2.51±0.07 <sup>c,B</sup><br>(-20%) | 2.63±0.09 <sup>d,B</sup><br>(-27%) |
| SA                        | 20.1±0.4 <sup>a,A</sup>  | 16.7±0.2 <sup>b,A</sup><br>(-17%)  | 15.1±0.3 <sup>c,A</sup><br>(-25%)   | 15.7±0.4 <sup>d,A</sup><br>(-22%)  | 31.6±0.6 <sup>a,B</sup>  | 24.3±0.4 <sup>b,B</sup><br>(-22%)  | 22.5±0.5 <sup>c,B</sup><br>(-29%)  | 23.1±0.7 <sup>d,B</sup><br>(-27%)  |
| EA                        | 2.65±0.13 <sup>a,A</sup> | 2.19±0.09 <sup>b,A</sup><br>(-4%)  | 1.93±0.10 <sup>c,A</sup><br>(-27%)  | 2.02±0.13 <sup>d,A</sup><br>(-24%) | 2.41±0.11 <sup>a,B</sup> | 1.86±0.21 <sup>b,B</sup><br>(-23%) | 1.66±0.15 <sup>c,B</sup><br>(-31%) | 1.74±0.10 <sup>d,B</sup><br>(-28%) |

---

The results are presented as means in dry matter  $\pm$  SD, n=5 (the mean of five measurements). For each variable and effect, values followed with different letters are significantly different at  $p<0.05$ . The percentage decreases in the values of free phenolics for individual storage conditions are presented in parentheses. E (epicatechin), C (catechin), R (rutin), Q (quercetin), NA (neochlorogenic acid), GA (gallic acid), PA (protocatechuic acid), *p*-OH-BA (*p*-hydroxybenzoic acid), CA (caffeic acid), *p*-CoA (*p*-coumaric acid), SA (sinapic acid), EA (ellagic acid), S (start of storage experiment), D (storage condition without the presence of sunlight at 23 °C), L (storage condition in the presence of sunlight at 23 °C), T (storage in the thermostatic device at 40 °C).

**Table S3.** Individual phenolic content in free phenolic fraction of the nutraceutical mixtures M3 and M4 under defined storage conditions.

| Free phenolics<br>(mg/kg) | M3S                      | M3D                                | M3L                                | M3T                                | M4S                      | M4D                                | M4L                                | M4T                                |
|---------------------------|--------------------------|------------------------------------|------------------------------------|------------------------------------|--------------------------|------------------------------------|------------------------------------|------------------------------------|
| E                         | 117±2 <sup>a,A</sup>     | 99.1±1.3 <sup>b,A</sup><br>(-15%)  | 90.1±1.1 <sup>c,A</sup><br>(-23%)  | 92.4±1.4 <sup>d,A</sup><br>(-21%)  | 72.6±0.2 <sup>a,B</sup>  | 61.7±1.1 <sup>b,B</sup><br>(-15%)  | 56.2±0.9 <sup>c,B</sup><br>(-23%)  | 57.6±1.9 <sup>d,B</sup><br>(-21%)  |
| C                         | 65.4±1.9 <sup>a,A</sup>  | 51.7±1.1 <sup>b,A</sup><br>(-21%)  | 45.2±1.2 <sup>c,A</sup><br>(-31%)  | 47.2±1.2 <sup>d,A</sup><br>(-28%)  | 46.4±1.4 <sup>a,B</sup>  | 34.2±0.8 <sup>b,B</sup><br>(-26%)  | 27.4±0.7 <sup>c,B</sup><br>(-41%)  | 29.8±0.9 <sup>d,B</sup><br>(-36%)  |
| R                         | 108±2 <sup>a,A</sup>     | 87.8±1.2 <sup>b,A</sup><br>(-19%)  | 77.4±0.8 <sup>c,A</sup><br>(-28%)  | 81.2±1.3 <sup>d,A</sup><br>(-25%)  | 82.7±0.6 <sup>a,B</sup>  | 64.8±0.2 <sup>b,B</sup><br>(-22%)  | 57.8±0.4 <sup>c,B</sup><br>(-30%)  | 60.2±1.2 <sup>d,B</sup><br>(-27%)  |
| Q                         | 0.86±0.04 <sup>a,A</sup> | 0.71±0.02 <sup>b,A</sup><br>(-10%) | 0.54±0.05 <sup>c,A</sup><br>(-37%) | 0.63±0.02 <sup>d,A</sup><br>(-27%) | 2.60±0.05 <sup>a,B</sup> | 2.03±0.02 <sup>b,B</sup><br>(-22%) | 1.76±0.08 <sup>c,B</sup><br>(-32%) | 1.82±0.04 <sup>d,B</sup><br>(-30%) |
| NA                        | 51.5±0.4 <sup>a,A</sup>  | 37.8±0.3 <sup>b,A</sup><br>(-27%)  | 33.7±0.7 <sup>c,A</sup><br>(-35%)  | 35.4±0.6 <sup>d,A</sup><br>(-31%)  | 48.7±0.2 <sup>a,B</sup>  | 37.1±0.6 <sup>b,A</sup><br>(-24%)  | 31.4±0.5 <sup>c,B</sup><br>(-36%)  | 34.7±0.2 <sup>d,B</sup><br>(-29%)  |
| GA                        | 2.32±0.01 <sup>a,A</sup> | 1.87±0.02 <sup>b,A</sup><br>(-19%) | 1.52±0.02 <sup>c,A</sup><br>(-34%) | 1.67±0.04 <sup>d,A</sup><br>(-28%) | 8.40±0.16 <sup>a,B</sup> | 6.25±0.22 <sup>b,B</sup><br>(-26%) | 5.87±0.10 <sup>c,B</sup><br>(-30%) | 6.01±0.22 <sup>b,B</sup><br>(-28%) |
| PA                        | 117±1 <sup>a,A</sup>     | 87.2±1.3 <sup>b,A</sup><br>(-25%)  | 83.4±0.9 <sup>c,A</sup><br>(-29%)  | 85.9±1.2 <sup>d,A</sup><br>(-27%)  | 103±1 <sup>a,B</sup>     | 79.8±2.1 <sup>b,B</sup><br>(-23%)  | 75.8±1.0 <sup>c,B</sup><br>(-26%)  | 77.1±0.9 <sup>d,B</sup><br>(-25%)  |
| <i>p</i> -OH-BA           | 7.01±0.12 <sup>a,A</sup> | 5.74±0.22 <sup>b,A</sup><br>(-18%) | 5.54±0.10 <sup>c,A</sup><br>(-21%) | 5.64±0.12 <sup>d,A</sup><br>(-20%) | 5.99±0.27 <sup>a,B</sup> | 4.47±0.11 <sup>b,B</sup><br>(-25%) | 4.30±0.07 <sup>c,B</sup><br>(-28%) | 4.42±0.22 <sup>d,B</sup><br>(-26%) |
| CA                        | 27.5±0.34 <sup>a,A</sup> | 21.9±0.27 <sup>b,A</sup><br>(-21%) | 19.5±0.04 <sup>c,A</sup><br>(-29%) | 20.4±0.22 <sup>d,A</sup><br>(-26%) | 24.7±1.09 <sup>a,B</sup> | 18.9±0.32 <sup>b,B</sup><br>(-23%) | 16.3±0.08 <sup>c,B</sup><br>(-34%) | 17.2±0.09 <sup>d,B</sup><br>(-30%) |
| <i>p</i> -CoA             | 3.35±0.11 <sup>a,A</sup> | 2.46±0.21 <sup>b,A</sup><br>(-27%) | 2.27±0.10 <sup>c,A</sup><br>(-32%) | 2.34±0.10 <sup>d,A</sup><br>(-30%) | 0.98±0.03 <sup>a,B</sup> | 0.74±0.02 <sup>b,B</sup><br>(-24%) | 0.61±0.02 <sup>c,B</sup><br>(-38%) | 0.69±0.04 <sup>d,B</sup><br>(-30%) |
| SA                        | 25.6±0.10 <sup>a,A</sup> | 21.1±0.30 <sup>b,A</sup><br>(-18%) | 19.2±0.07 <sup>c,A</sup><br>(-25%) | 20.1±0.10 <sup>d,A</sup><br>(-21%) | 33.0±0.06 <sup>a,B</sup> | 26.5±0.01 <sup>b,B</sup><br>(-20%) | 23.1±0.05 <sup>c,B</sup><br>(-30%) | 24.7±0.08 <sup>d,B</sup><br>(-25%) |
| EA                        | 0.88±0.03 <sup>a,A</sup> | 0.67±0.08 <sup>b,A</sup><br>(-24%) | 0.57±0.01 <sup>c,A</sup><br>(-35%) | 0.61±0.02 <sup>d,A</sup><br>(-31%) | 0.55±0.02 <sup>a,B</sup> | 0.38±0.02 <sup>b,B</sup><br>(-31%) | 0.31±0.02 <sup>c,B</sup><br>(-44%) | 0.34±0.04 <sup>d,B</sup><br>(-37%) |

The results are presented as means in dry matter  $\pm$  SD, n=5 (the mean of five measurements). For each variable and effect, values followed with different letters are significantly different at  $p < 0.05$ . The percentage decreases in the values of free phenolics for individual storage conditions are presented in parentheses. E (epicatechin), C (catechin), R (rutin), Q (quercetin), NA (neochlorogenic acid), GA (gallic acid), PA (protocatechuic acid), *p*-OH-BA (*p*-hydroxybenzoic acid), CA (caffeic acid), *p*-CoA (*p*-coumaric acid), SA (sinapic acid), EA (ellagic acid), S (start of storage experiment), D (storage condition without the presence of sunlight at 23 °C), L (storage condition in the presence of sunlight at 23 °C), T (storage in the thermostatic device at 40 °C).

**Table S4.** Individual phenolic content in soluble bound phenolic fraction of the nutraceutical mixtures M1 and M2 under defined storage conditions.

| Soluble<br>bound<br>phenolics<br>(mg/kg) | M1S                      | M1D                                | M1L                                | M1T                                | M2S                      | M2D                                | M2L                                | M2T                                |
|------------------------------------------|--------------------------|------------------------------------|------------------------------------|------------------------------------|--------------------------|------------------------------------|------------------------------------|------------------------------------|
| E                                        | 182±2 <sup>a,A</sup>     | 143±4 <sup>b,A</sup><br>(-21%)     | 136±3 <sup>c,A</sup><br>(-25%)     | 139±1 <sup>d,A</sup><br>(-24%)     | 129±2 <sup>a,B</sup>     | 107±2.1 <sup>b,B</sup><br>(-17%)   | 98.6±0.7 <sup>c,B</sup><br>(-24%)  | 101±2 <sup>d,B</sup><br>(-22%)     |
| C                                        | 80.7±0.4 <sup>a,A</sup>  | 64.3±0.2 <sup>b,A</sup><br>(-20%)  | 58.3±0.5 <sup>c,A</sup><br>(-28%)  | 61.1±0.7 <sup>d,A</sup><br>(-24%)  | 48.9±0.1 <sup>a,B</sup>  | 41.9±0.3 <sup>b,B</sup><br>(-14%)  | 36.4±0.2 <sup>c,B</sup><br>(-26%)  | 37.9±0.4 <sup>d,B</sup><br>(-22%)  |
| R                                        | 16.2±0.3 <sup>a,A</sup>  | 12.7±0.1 <sup>b,A</sup><br>(-22%)  | 10.8±0.4 <sup>c,A</sup><br>(-33%)  | 11.2±0.5 <sup>d,A</sup><br>(-31%)  | 17.8±0.3 <sup>a,B</sup>  | 14.6±0.2 <sup>b,B</sup><br>(-18%)  | 11.1±0.2 <sup>c,A</sup><br>(-38%)  | 12.0±0.2 <sup>d,B</sup><br>(-33%)  |
| Q                                        | 1.22±0.05 <sup>a,A</sup> | 0.88±0.02 <sup>b,A</sup><br>(-28%) | 0.71±0.01 <sup>c,A</sup><br>(-42%) | 0.76±0.02 <sup>d,A</sup><br>(-38%) | 0.19±0.02 <sup>a,B</sup> | 0.14±0.01 <sup>b,B</sup><br>(-26%) | 0.10±0.01 <sup>c,B</sup><br>(-47%) | 0.12±0.01 <sup>d,B</sup><br>(-37%) |
| NA                                       | 11.8±0.3 <sup>a,A</sup>  | 9.23±0.1 <sup>b,A</sup><br>(-22%)  | 8.74±0.12 <sup>c,A</sup><br>(-26%) | 9.01±0.4 <sup>d,A</sup><br>(-24%)  | 4.78±0.09 <sup>a,B</sup> | 3.97±0.03 <sup>b,B</sup><br>(-17%) | 3.61±0.06 <sup>c,B</sup><br>(-24%) | 3.72±0.05 <sup>d,B</sup><br>(-22%) |
| GA                                       | 4.18±0.18 <sup>a,A</sup> | 3.07±0.11 <sup>b,A</sup><br>(-27%) | 2.71±0.10 <sup>c,A</sup><br>(-35%) | 2.87±0.10 <sup>d,A</sup><br>(-31%) | 58.8±0.2 <sup>a,B</sup>  | 50.7±0.2 <sup>b,B</sup><br>(-14%)  | 45.7±0.2 <sup>c,B</sup><br>(-22%)  | 47.2±0.4 <sup>d,B</sup><br>(-20%)  |
| PA                                       | 101±3 <sup>a,A</sup>     | 83.7±2.3 <sup>b,A</sup><br>(-17%)  | 79.8±1.1 <sup>c,A</sup><br>(-21%)  | 81.2±1.4 <sup>d,A</sup><br>(-20%)  | 101±2 <sup>a,A</sup>     | 69.9±1.2 <sup>b,B</sup><br>(-31%)  | 65.1±0.9 <sup>c,B</sup><br>(-36%)  | 67.8±1.0 <sup>d,B</sup><br>(-33%)  |
| <i>p</i> -OH-BA                          | 0.91±0.05 <sup>a,A</sup> | 0.67±0.02 <sup>b,A</sup><br>(-26%) | 0.56±0.04 <sup>c,A</sup><br>(-38%) | 0.59±0.02 <sup>d,A</sup><br>(-35%) | 0.41±0.02 <sup>a,B</sup> | 0.28±0.01 <sup>b,B</sup><br>(-32%) | 0.22±0.01 <sup>c,B</sup><br>(-46%) | 0.24±0.02 <sup>d,B</sup><br>(-41%) |
| CA                                       | 1.62±0.06 <sup>a,A</sup> | 1.32±0.02 <sup>b,A</sup><br>(-19%) | 1.23±0.05 <sup>c,A</sup><br>(-24%) | 1.27±0.01 <sup>d,A</sup><br>(-22%) | 3.05±0.11 <sup>a,B</sup> | 2.47±0.08 <sup>b,B</sup><br>(-19%) | 2.28±0.12 <sup>c,B</sup><br>(-25%) | 2.32±0.13 <sup>d,B</sup><br>(-24%) |
| <i>p</i> -CoA                            | 0.56±0.10 <sup>a,A</sup> | 0.47±0.08 <sup>b,A</sup><br>(-16%) | 0.37±0.05 <sup>c,A</sup><br>(-34%) | 0.42±0.01 <sup>d,A</sup><br>(-25%) | 0.27±0.04 <sup>a,B</sup> | 0.21±0.01 <sup>b,B</sup><br>(-22%) | 0.16±0.02 <sup>c,B</sup><br>(-41%) | 0.18±0.04 <sup>d,B</sup><br>(-33%) |
| SA                                       | 3.02±0.02 <sup>a,A</sup> | 2.67±0.02 <sup>b,A</sup>           | 2.52±0.02 <sup>c,A</sup>           | 2.61±0.02 <sup>d,A</sup>           | 1.10±0.09 <sup>a,B</sup> | 0.92±0.05 <sup>b,B</sup>           | 0.81±0.01 <sup>c,B</sup>           | 0.87±0.04 <sup>d,B</sup>           |

|    |                          | (-12%)                   | (-17%)                   | (-14%)                   |                          | (-16%)                   | (-26%)                   | (-21%)                   |
|----|--------------------------|--------------------------|--------------------------|--------------------------|--------------------------|--------------------------|--------------------------|--------------------------|
| EA | 0.09±0.01 <sup>a,A</sup> | 0.07±0.01 <sup>b,A</sup> | 0.06±0.01 <sup>b,A</sup> | 0.06±0.01 <sup>b,A</sup> | 0.13±0.01 <sup>a,B</sup> | 0.10±0.02 <sup>b,B</sup> | 0.07±0.01 <sup>c,A</sup> | 0.08±0.01 <sup>c,B</sup> |
|    |                          | (-22%)                   | (-3%)                    | (-3%)                    |                          | (-23%)                   | (-46%)                   | (-38%)                   |

The results are presented as means in dry matter ± SD, n=5 (the mean of five measurements). For each variable and effect, values followed with different letters are significantly different at  $p<0.05$ . The percentage decreases in the values of soluble bound phenolics for individual storage conditions are presented in parentheses. E (epicatechin), C (catechin), R (rutin), Q (quercetin), NA (neochlorogenic acid), GA (gallic acid), PA (protocatechuic acid), *p*-OH-BA (*p*-hydroxybenzoic acid), CA (caffeic acid), *p*-CoA (*p*-coumaric acid), SA (sinapic acid), EA (ellagic acid), S (start of storage experiment), D (storage condition without the presence of sunlight at 23 °C), L (storage condition in the presence of sunlight at 23 °C), T (storage in the thermostatic device at 40 °C).

**Table S5.** Individual phenolic content in soluble bound phenolic fraction of the nutraceutical mixtures M3 and M4 under defined storage conditions.

| Soluble<br>bound<br>phenolics<br>(mg/kg) | M3S                      | M3D                                | M3L                                | M3T                                 | M4S                      | M4D                                | M4L                                | M4T                                |
|------------------------------------------|--------------------------|------------------------------------|------------------------------------|-------------------------------------|--------------------------|------------------------------------|------------------------------------|------------------------------------|
| E                                        | 117±2 <sup>a,A</sup>     | 99.7±1.3 <sup>b,A</sup><br>(-15%)  | 95.4±1.1 <sup>c,A</sup><br>(-18%)  | 97.4±0.8 <sup>d,A</sup><br>(-17%)   | 65.6±0.1 <sup>a,B</sup>  | 53.7±0.3 <sup>b,B</sup><br>(-18%)  | 48.2±0.4 <sup>c,B</sup><br>(-27%)  | 50.7±0.7 <sup>d,B</sup><br>(-23%)  |
| C                                        | 118±1 <sup>a,A</sup>     | 96.3±4 <sup>b,A</sup><br>(-18%)    | 92.7±0.9 <sup>c,A</sup><br>(-21%)  | 94.0±1.1 <sup>d,A</sup><br>(-20%)   | 73.0±0.4 <sup>a,B</sup>  | 57.2±0.1 <sup>b,B</sup><br>(-22%)  | 52.1±0.2 <sup>c,B</sup><br>(-29%)  | 54.3±0.6 <sup>d,B</sup><br>(-26%)  |
| R                                        | 33.1±0.1 <sup>a,A</sup>  | 27.4±0.2 <sup>b,A</sup><br>(-17%)  | 23.2±0.1 <sup>c,A</sup><br>(-30%)  | 25.3±0.2 <sup>d,A</sup><br>(-24%)   | 24.4±0.2 <sup>a,B</sup>  | 18.9±0.2 <sup>b,B</sup><br>(-23%)  | 16.0±0.1 <sup>c,B</sup><br>(-34%)  | 17.1±0.4 <sup>d,B</sup><br>(-30%)  |
| Q                                        | 0.87±0.04 <sup>a,A</sup> | 0.62±0.01 <sup>b,A</sup><br>(-29%) | 0.52±0.03 <sup>c,A</sup><br>(-40%) | 0.57±0.05 <sup>d,A</sup><br>(-34%)  | 0.19±0.03 <sup>a,B</sup> | 0.13±0.02 <sup>b,B</sup><br>(-32%) | 0.11±0.01 <sup>c,B</sup><br>(-42%) | 0.13±0.01 <sup>b,B</sup><br>(-32%) |
| NA                                       | 7.08±0.12 <sup>a,A</sup> | 6.02±0.02 <sup>b,A</sup><br>(-15%) | 5.60±0.09 <sup>c,A</sup><br>(-21%) | 5.74±0.11 <sup>d,A</sup><br>(-19%)  | 6.60±0.18 <sup>a,B</sup> | 5.47±0.12 <sup>b,B</sup><br>(-17%) | 5.03±0.11 <sup>c,B</sup><br>(-24%) | 5.21±0.10 <sup>d,B</sup><br>(-21%) |
| GA                                       | 2.60±0.09 <sup>a,A</sup> | 2.07±0.02 <sup>b,A</sup><br>(-20%) | 1.82±0.05 <sup>c,A</sup><br>(-30%) | 1.99±0.05 <sup>d,A</sup><br>(-23%)  | 55.1±0.2 <sup>a,B</sup>  | 47.4±0.3 <sup>b,B</sup><br>(-14%)  | 43.7±0.2 <sup>c,B</sup><br>(-21%)  | 45.1±0.6 <sup>d,B</sup><br>(-18%)  |
| PA                                       | 72.2±0.4 <sup>a,A</sup>  | 57.9±0.2 <sup>b,A</sup><br>(-20%)  | 53.2±0.2 <sup>c,A</sup><br>(-26 %) | 55.2±0.4 <sup>d,A</sup><br>(-24%)   | 60.1±0.9 <sup>a,B</sup>  | 47.2±0.7 <sup>b,B</sup><br>(-21%)  | 42.1±0.7 <sup>c,B</sup><br>(-30%)  | 45.8±0.2 <sup>d,B</sup><br>(-24%)  |
| <i>p</i> -OH-BA                          | 0.66±0.06 <sup>a,A</sup> | 0.47±0.04 <sup>b,A</sup><br>(-29%) | 0.41±0.02 <sup>c,A</sup><br>(-38%) | 0.45±0.04 <sup>d,A</sup><br>(-32%)  | 0.58±0.04 <sup>a,B</sup> | 0.41±0.01 <sup>b,B</sup><br>(-29%) | 0.33±0.02 <sup>c,B</sup><br>(-43%) | 0.37±0.01 <sup>d,B</sup><br>(-36%) |
| CA                                       | 2.64±0.05 <sup>a,A</sup> | 2.17±0.01 <sup>b,A</sup><br>(-18%) | 2.02±0.01 <sup>c,A</sup><br>(-23%) | 2.10 ±0.04 <sup>d,A</sup><br>(-20%) | 1.05±0.10 <sup>a,B</sup> | 0.74±0.02 <sup>b,B</sup><br>(-30%) | 0.67±0.04 <sup>c,B</sup><br>(-36%) | 0.71±0.10 <sup>d,B</sup><br>(-32%) |
| <i>p</i> -CoA                            | 0.59±0.03 <sup>a,A</sup> | 0.42±0.01 <sup>b,A</sup><br>(-29%) | 0.34±0.01 <sup>c,A</sup><br>(-42%) | 0.38±0.03 <sup>d,A</sup><br>(-36%)  | 0.37±0.04 <sup>a,B</sup> | 0.29±0.05 <sup>b,B</sup><br>(-22%) | 0.22±0.05 <sup>c,B</sup><br>(-41%) | 0.26±0.04 <sup>d,B</sup><br>(-30%) |
| SA                                       | 7.34±0.14 <sup>a,A</sup> | 6.37±0.10 <sup>b,A</sup><br>(-13%) | 6.03±0.10 <sup>c,A</sup><br>(-18%) | 6.21±0.11 <sup>d,A</sup><br>(-15%)  | 6.03±0.01 <sup>a,B</sup> | 5.12±0.01 <sup>b,B</sup><br>(-15%) | 4.93±0.02 <sup>c,B</sup><br>(-18%) | 5.01±0.02 <sup>d,B</sup><br>(-17%) |



---

|    |                          |                          |                          |                          |                        |                          |                          |                          |
|----|--------------------------|--------------------------|--------------------------|--------------------------|------------------------|--------------------------|--------------------------|--------------------------|
| EA | 0.36±0.03 <sup>a,A</sup> | 0.27±0.04 <sup>b,A</sup> | 0.21±0.02 <sup>c,A</sup> | 0.24±0.02 <sup>d,A</sup> | 0.59±0.04 <sup>a</sup> | 0.46±0.01 <sup>b,B</sup> | 0.39±0.01 <sup>c,B</sup> | 0.42±0.01 <sup>d,B</sup> |
|    |                          | (-25%)                   | (-42%)                   | (-32%)                   |                        | (-22%)                   | (-34%)                   | (-29%)                   |

---

The results are presented as means in dry matter ± SD, n=5 (the mean of five measurements). For each variable and effect, values followed with different letters are significantly different at  $p<0.05$ . The percentage decreases in the values of soluble bound phenolics for individual storage conditions are presented in parentheses. E (epicatechin), C (catechin), R (rutin), Q (quercetin), NA (neochlorogenic acid), GA (gallic acid), PA (protocatechuic acid), *p*-OH-BA (*p*-hydroxybenzoic acid), CA (caffeic acid), *p*-CoA (*p*-coumaric acid), SA (sinapic acid), EA (ellagic acid), S (start of storage experiment), D (storage condition without the presence of sunlight at 23 °C), L (storage condition in the presence of sunlight at 23 °C), T (storage in the thermostatic device at 40 °C).

**Table S6.** Individual phenolic content in insoluble bound phenolic fraction of the nutraceutical mixtures M1 and M2 under defined storage conditions.

| Insoluble<br>bound<br>phenolics<br>(mg/kg) | M1S                      | M1D                                | M1L                                | M1T                                | M2S                      | M2D                                | M2L                                | M2T                                |
|--------------------------------------------|--------------------------|------------------------------------|------------------------------------|------------------------------------|--------------------------|------------------------------------|------------------------------------|------------------------------------|
| E                                          | 93.1±1.3 <sup>a,A</sup>  | 75.3±1.1 <sup>b,A</sup><br>(-19%)  | 71.1±0.6 <sup>c,A</sup><br>(-24%)  | 72.1±0.8 <sup>d,A</sup><br>(-23%)  | 116±2 <sup>a,B</sup>     | 97.2±1.7 <sup>b,B</sup><br>(-16%)  | 93.9±0.9 <sup>c,B</sup><br>(-19%)  | 95.1±1.0 <sup>d,B</sup><br>(-18%)  |
| C                                          | 6.54±0.09 <sup>a,A</sup> | 5.05±0.06 <sup>b,A</sup><br>(-23%) | 4.75±0.04 <sup>c,A</sup><br>(-27%) | 4.89±0.05 <sup>d,A</sup><br>(-25%) | 6.89±0.16 <sup>a,B</sup> | 5.78±0.21 <sup>b,B</sup><br>(-16%) | 5.50±0.10 <sup>c,B</sup><br>(-20%) | 5.61±0.16 <sup>d,B</sup><br>(-19%) |
| R                                          | 0.70±0.05 <sup>a,A</sup> | 0.49±0.04 <sup>b,A</sup><br>(-30%) | 0.41±0.01 <sup>c,A</sup><br>(-41%) | 0.44±0.02 <sup>d,A</sup><br>(-37%) | 5.33±0.06 <sup>a,B</sup> | 4.47±0.04 <sup>b,B</sup><br>(-16%) | 4.03±0.02 <sup>c,B</sup><br>(-24%) | 4.20±0.05 <sup>d,B</sup><br>(-21%) |
| Q                                          | 1.09±0.05 <sup>a,A</sup> | 0.77±0.02 <sup>b,A</sup><br>(-29%) | 0.68±0.02 <sup>c,A</sup><br>(-38%) | 0.71±0.01 <sup>d,A</sup><br>(-35%) | 1.30±0.03 <sup>a,B</sup> | 1.01±0.02 <sup>b,B</sup><br>(-22%) | 0.89±0.01 <sup>c,B</sup><br>(-32%) | 0.92±0.04 <sup>d,B</sup><br>(-29%) |
| NA                                         | 26.4±0.2 <sup>a,A</sup>  | 21.8±0.2 <sup>b,A</sup><br>(-17%)  | 19.3±0.2 <sup>c,A</sup><br>(-27%)  | 20.2±0.5 <sup>d,A</sup><br>(-23%)  | 28.2±0.1 <sup>a,B</sup>  | 22.3±0.2 <sup>b,B</sup><br>(-21%)  | 20.1±0.3 <sup>c,B</sup><br>(-29%)  | 21.3±0.2 <sup>d,B</sup><br>(-24%)  |
| GA                                         | 0.47±0.04 <sup>a,A</sup> | 0.38±0.02 <sup>b,A</sup><br>(-19%) | 0.31±0.02 <sup>c,A</sup><br>(-34%) | 0.33±0.06 <sup>c,A</sup><br>(-30%) | 0.56±0.01 <sup>a,B</sup> | 0.41±0.01 <sup>b,B</sup><br>(-27%) | 0.34±0.01 <sup>c,A</sup><br>(-39%) | 0.37±0.04 <sup>d,A</sup><br>(-34%) |
| PA                                         | 4.01±0.06 <sup>a,A</sup> | 3.27±0.01 <sup>b,A</sup><br>(-18%) | 3.01±0.04 <sup>c,A</sup><br>(-25%) | 3.07±0.04 <sup>d,A</sup><br>(-23%) | 3.63±0.08 <sup>a,B</sup> | 3.02±0.06 <sup>b,B</sup><br>(-17%) | 2.88±0.04 <sup>c,B</sup><br>(-39%) | 2.98±0.04 <sup>d,B</sup><br>(-18%) |
| <i>p</i> -OH-BA                            | 1.61±0.08 <sup>a,A</sup> | 1.21±0.07 <sup>b,A</sup><br>(-25%) | 1.01±0.02 <sup>c,A</sup><br>(-37%) | 1.07±0.09 <sup>d,A</sup><br>(-34%) | 1.42±0.06 <sup>a,B</sup> | 1.07±0.04 <sup>b,B</sup><br>(-25%) | 0.95±0.02 <sup>c,B</sup><br>(-33%) | 0.95±0.07 <sup>c,B</sup><br>(-33%) |
| CA                                         | 4.86±0.10 <sup>a,A</sup> | 3.74±0.08 <sup>b,A</sup><br>(-23%) | 3.57±0.08 <sup>c,A</sup><br>(-20%) | 3.62±0.09 <sup>d,A</sup><br>(-26%) | 5.18±0.09 <sup>a,B</sup> | 4.03±0.02 <sup>b,B</sup><br>(-22%) | 3.82±0.04 <sup>c,B</sup><br>(-26%) | 3.99±0.10 <sup>b,B</sup><br>(-23%) |
| <i>p</i> -CoA                              | 0.29±0.04 <sup>a,A</sup> | 0.21±0.04 <sup>b,A</sup><br>(-28%) | 0.17±0.02 <sup>c,A</sup><br>(-41%) | 0.19±0.02 <sup>d,A</sup><br>(-34%) | 0.36±0.03 <sup>a,B</sup> | 0.29±0.04 <sup>b,B</sup><br>(-28%) | 0.27±0.01 <sup>c,B</sup><br>(-25%) | 0.27±0.04 <sup>c,B</sup><br>(-25%) |
| SA                                         | 5.72±0.19 <sup>a,A</sup> | 4.87±0.11 <sup>b,A</sup><br>(-15%) | 4.78±0.10 <sup>c,A</sup><br>(-16%) | 4.81±0.08 <sup>d,A</sup><br>(-16%) | 7.59±0.07 <sup>a,B</sup> | 6.47±0.05 <sup>b,B</sup><br>(-15%) | 6.34±0.02 <sup>c,B</sup><br>(-16%) | 6.39±0.05 <sup>c,B</sup><br>(-16%) |

|    |                          |                          |                          |                          |                          |                          |                          |                          |
|----|--------------------------|--------------------------|--------------------------|--------------------------|--------------------------|--------------------------|--------------------------|--------------------------|
| EA | 2.19±0.06 <sup>a,A</sup> | 1.74±0.02 <sup>b,A</sup> | 1.67±0.04 <sup>c,A</sup> | 1.71±0.02 <sup>d,A</sup> | 2.52±0.07 <sup>a,B</sup> | 1.99±0.04 <sup>b,B</sup> | 1.81±0.05 <sup>c,B</sup> | 1.87±0.08 <sup>c,B</sup> |
|    |                          | (-21%)                   | (-24%)                   | (-22%)                   |                          | (-21%)                   | (-28%)                   | (-26%)                   |

The results are presented as means in dry matter ± SD, n=5 (the mean of five measurements). For each variable and effect, values followed with different letters are significantly different at  $p<0.05$ . The percentage decreases in the values of insoluble bound phenolics for individual storage conditions are presented in parentheses. E (epicatechin), C (catechin), R (rutin), Q (quercetin), NA (neochlorogenic acid), GA (gallic acid), PA (protocatechuic acid), *p*-OH-BA (*p*-hydroxybenzoic acid), CA (caffeic acid), *p*-CoA (*p*-coumaric acid), SA (sinapic acid), EA (ellagic acid), S (start of storage experiment), D (storage condition without the presence of sunlight at 23 °C), L (storage condition in the presence of sunlight at 23 °C), T (storage in the thermostatic device at 40 °C).

**Table S7.** Individual phenolic content in insoluble bound phenolic fraction of the nutraceutical mixtures M3 and M4 under defined storage conditions.

| <b>Insoluble<br/>bound<br/>phenolics<br/>(mg/kg)</b> | <b>M3S</b>               | <b>M3D</b>                          | <b>M3L</b>                         | <b>M3T</b>                         | <b>M4S</b>               | <b>M4D</b>                         | <b>M4L</b>                         | <b>M4T</b>                         |
|------------------------------------------------------|--------------------------|-------------------------------------|------------------------------------|------------------------------------|--------------------------|------------------------------------|------------------------------------|------------------------------------|
| E                                                    | 20.4±0.5 <sup>a,A</sup>  | 16.3±0.2 <sup>b,A</sup><br>(-20%)   | 12.7±0.4 <sup>c,A</sup><br>(-38%)  | 14.2±0.4 <sup>d,A</sup><br>(-30%)  | 30.7±0.3 <sup>a,B</sup>  | 24.2±0.1 <sup>b,B</sup><br>(-21%)  | 21.3±0.4 <sup>c,B</sup><br>(-31%)  | 22.7±0.5 <sup>d,B</sup><br>(-26%)  |
| C                                                    | 11.3±0.1 <sup>a,A</sup>  | 9.22±0.1 <sup>b,A</sup><br>(-18%)   | 8.87±0.1 <sup>c,A</sup><br>(-22%)  | 9.02±0.2 <sup>d,A</sup><br>(-20%)  | 10.4±0.3 <sup>a,B</sup>  | 8.87±0.2 <sup>b,B</sup><br>(-15%)  | 7.82±0.2 <sup>c,B</sup><br>(-25%)  | 8.12±0.2 <sup>d,A</sup><br>(-22%)  |
| R                                                    | 5.82±0.09 <sup>a,A</sup> | 4.27±0.04 <sup>b,A</sup><br>(-27%)  | 3.99±0.02 <sup>c,A</sup><br>(-31%) | 4.07±0.04 <sup>d,A</sup><br>(-30%) | 2.71±0.05 <sup>a,B</sup> | 2.08±0.01 <sup>b,B</sup><br>(-23%) | 1.81±0.04 <sup>c,B</sup><br>(-33%) | 1.87±0.04 <sup>c,B</sup><br>(-31%) |
| Q                                                    | 0.49±0.06 <sup>a,A</sup> | 0.37±0.01 <sup>b,A</sup><br>(-24%)  | 0.28±0.02 <sup>c,A</sup><br>(-43%) | 0.31±0.05 <sup>d,A</sup><br>(-37%) | 1.35±0.06 <sup>a,B</sup> | 1.06±0.02 <sup>b,B</sup><br>(-21%) | 0.87±0.05 <sup>c,B</sup><br>(-36%) | 0.99±0.07 <sup>d,B</sup><br>(-27%) |
| NA                                                   | 26.0±0.3 <sup>a,A</sup>  | 20.7±0.3 <sup>b,A</sup><br>(-20%)   | 18.3±0.2 <sup>c,A</sup><br>(-30%)  | 19.9±0.4 <sup>d,A</sup><br>(-23%)  | 63.1±0.3 <sup>a,B</sup>  | 52.8±0.1 <sup>b,B</sup><br>(-16%)  | 48.9±0.2 <sup>c,B</sup><br>(-23%)  | 50.3±0.5 <sup>d,B</sup><br>(-20%)  |
| GA                                                   | 0.50±0.04 <sup>a,A</sup> | 0.38±0.01 <sup>b,A</sup><br>(-24%)  | 0.31±0.02 <sup>c,A</sup><br>(-38%) | 0.34±0.06 <sup>d,A</sup><br>(-32%) | 3.30±0.02 <sup>a,B</sup> | 2.89±0.03 <sup>b,B</sup><br>(-12%) | 2.62±0.01 <sup>c,B</sup><br>(-21%) | 2.74±0.04 <sup>d,B</sup><br>(-17%) |
| PA                                                   | 18.9±0.3 <sup>a,A</sup>  | 14.7±0.2 <sup>b,A</sup><br>(-22%)   | 12.1±0.1 <sup>c,A</sup><br>(-36%)  | 12.7±0.07 <sup>d,A</sup><br>(-3%)  | 22.3±0.17 <sup>a,B</sup> | 17.1±0.12 <sup>b,B</sup><br>(-23%) | 15.2±0.10 <sup>c,B</sup><br>(-32%) | 15.9±0.11 <sup>d,B</sup><br>(-29%) |
| <i>p</i> -OH-BA                                      | 0.61±0.03 <sup>a,A</sup> | 0.48±0.01 <sup>b,A</sup><br>(-21%)  | 0.37±0.01 <sup>c,A</sup><br>(-39%) | 0.42±0.04 <sup>d,A</sup><br>(-31%) | 3.12±0.10 <sup>a,B</sup> | 2.47±0.01 <sup>b,B</sup><br>(-21%) | 2.01±0.07 <sup>c,B</sup><br>(-36%) | 2.12±0.04 <sup>d,B</sup><br>(-32%) |
| CA                                                   | 3.51±0.06 <sup>a,A</sup> | 2.47±0.04 <sup>b,A</sup><br>(-30 %) | 2.34±0.04 <sup>c,A</sup><br>(-33%) | 2.41±0.04 <sup>d,A</sup><br>(-31%) | 2.85±0.02 <sup>a,B</sup> | 2.07±0.01 <sup>b,B</sup><br>(-27%) | 1.91±0.04 <sup>c,B</sup><br>(-33%) | 1.97±0.04 <sup>c,B</sup><br>(-31%) |
| <i>p</i> -CoA                                        | 0.20±0.02 <sup>a,A</sup> | 0.14±0.01 <sup>b,A</sup><br>(-30%)  | 0.11±0.01 <sup>c,A</sup><br>(-45%) | 0.12±0.01 <sup>c,A</sup><br>(-40%) | 0.10±0.02 <sup>a,B</sup> | 0.07±0.01 <sup>b,B</sup><br>(-30%) | 0.06±0.01 <sup>b,B</sup><br>(-40%) | 0.06±0.01 <sup>b,B</sup><br>(-40%) |
| SA                                                   | 5.03±0.06 <sup>a,A</sup> | 4.02±0.01 <sup>b,A</sup><br>(-20%)  | 3.91±0.01 <sup>c,A</sup><br>(-22%) | 3.97±0.04 <sup>d,A</sup><br>(-21%) | 1.39±0.08 <sup>a,B</sup> | 1.07±0.04 <sup>b,B</sup><br>(-23%) | 0.99±0.02 <sup>c,B</sup><br>(-29%) | 1.02±0.09 <sup>c,B</sup><br>(-27%) |

|    |                          |                          |                          |                          |                          |                          |                          |                          |
|----|--------------------------|--------------------------|--------------------------|--------------------------|--------------------------|--------------------------|--------------------------|--------------------------|
| EA | 0.63±0.06 <sup>a,A</sup> | 0.47±0.08 <sup>b,A</sup> | 0.38±0.01 <sup>c,A</sup> | 0.42±0.05 <sup>d,A</sup> | 1.27±0.09 <sup>a,B</sup> | 0.97±0.02 <sup>b,B</sup> | 0.98±0.04 <sup>b,B</sup> | 0.91±0.05 <sup>c,B</sup> |
|    |                          | (-25%)                   | (40%)                    | (-33%)                   |                          | (-24%)                   | (-23%)                   | (-29%)                   |

The results are presented as means in dry matter ± SD, n=5 (the mean of five measurements). For each variable and effect, values followed with different letters are significantly different at  $p<0.05$ . The percentage decreases in the values of insoluble bound phenolics for individual storage conditions are presented in parentheses. E (epicatechin), C (catechin), R (rutin), Q (quercetin), NA (neochlorogenic acid), GA (gallic acid), PA (protocatechuic acid), *p*-OH-BA (*p*-hydroxybenzoic acid), CA (caffeic acid), *p*-CoA (*p*-coumaric acid), SA (sinapic acid), EA (ellagic acid), S (start of storage experiment), D (storage condition without the presence of sunlight at 23 °C), L (storage condition in the presence of sunlight at 23 °C), T (storage in the thermostatic device at 40 °C).

**Table S8.** Total individual phenolic content of the nutraceutical mixtures M1 and M2 under defined storage conditions.

| Total phenolics (mg/kg) | M1S                      | M1D                                | M1L                                | M1T                                | M2S                      | M2D                                | M2L                                | M2T                                |
|-------------------------|--------------------------|------------------------------------|------------------------------------|------------------------------------|--------------------------|------------------------------------|------------------------------------|------------------------------------|
| E                       | 400±3 <sup>a,A</sup>     | 320±4 <sup>b,A</sup><br>(-20%)     | 302±3 <sup>c,A</sup><br>(-25%)     | 308±2 <sup>d,A</sup><br>(-23%)     | 331±3 <sup>a,B</sup>     | 275±3 <sup>b,B</sup><br>(-17%)     | 254±1 <sup>c,B</sup><br>(-23%)     | 261±3 <sup>d,B</sup><br>(-21%)     |
| C                       | 97.1±0.6 <sup>a,A</sup>  | 76.6±0.3 <sup>b,A</sup><br>(-21%)  | 69.6±0.5 <sup>c,A</sup><br>(-28%)  | 72.8±0.9 <sup>d,A</sup><br>(-25%)  | 99.1±0.5 <sup>a,B</sup>  | 83.9±0.4 <sup>b,B</sup><br>(-15%)  | 70.6±0.5 <sup>c,B</sup><br>(-29%)  | 75.9±1.2 <sup>d,B</sup><br>(-23%)  |
| R                       | 18.2±0.3 <sup>a,A</sup>  | 14.2±0.1 <sup>b,A</sup><br>(-22%)  | 12.1±0.4 <sup>c,A</sup><br>(-34%)  | 12.6±0.5 <sup>d,A</sup><br>(-31%)  | 109±1 <sup>a,B</sup>     | 91.4±0.4 <sup>b,B</sup><br>(-16%)  | 79.3±0.4 <sup>c,B</sup><br>(-27%)  | 83.4±1.2 <sup>d,B</sup><br>(-23%)  |
| Q                       | 4.77±0.2 <sup>a,A</sup>  | 3.43±0.3 <sup>b,A</sup><br>(-28%)  | 2.90±0.1 <sup>c,A</sup><br>(-39%)  | 3.09±0.12 <sup>d,A</sup><br>(-35%) | 5.19±0.16 <sup>a,B</sup> | 4.14±0.22 <sup>b,B</sup><br>(-20%) | 3.61±0.16 <sup>c,B</sup><br>(-30%) | 3.78±0.15 <sup>d,B</sup><br>(-27%) |
| NA                      | 103±1 <sup>a,A</sup>     | 83.7±0.3 <sup>b,A</sup><br>(-19%)  | 73.2±0.5 <sup>c,A</sup><br>(-29%)  | 77.0±0.8 <sup>d,A</sup><br>(-25%)  | 87.3±0.6 <sup>a,B</sup>  | 68.0±0.2 <sup>b,B</sup><br>(-22%)  | 58.9±1.0 <sup>c,B</sup><br>(-33%)  | 62.2±0.8 <sup>d,B</sup><br>(-29%)  |
| GA                      | 12.7±0.5 <sup>a,A</sup>  | 9.89±0.33 <sup>b,A</sup><br>(-22%) | 9.05±0.12 <sup>c,A</sup><br>(-29%) | 9.41±0.55 <sup>d,A</sup><br>(-26%) | 74.3±0.5 <sup>a,B</sup>  | 63.2±0.5 <sup>b,B</sup><br>(-15%)  | 55.7±0.4 <sup>c,B</sup><br>(-25%)  | 58.5±0.6 <sup>d,B</sup><br>(-21%)  |
| PA                      | 220±4 <sup>a,A</sup>     | 176±3 <sup>b,A</sup><br>(-20%)     | 167±2 <sup>c,A</sup><br>(-24%)     | 171±2 <sup>d,A</sup><br>(-22%)     | 233±3 <sup>a,B</sup>     | 176±2 <sup>b,A</sup><br>(-24%)     | 165±2 <sup>c,A</sup><br>(-29%)     | 169±2 <sup>d,A</sup><br>(-27%)     |
| <i>p</i> -OH-BA         | 5.21±0.20 <sup>a,A</sup> | 3.87±0.23 <sup>b,A</sup><br>(-26%) | 3.38±0.11 <sup>c,A</sup><br>(-35%) | 3.63±0.14 <sup>d,A</sup><br>(-30%) | 7.97±0.07 <sup>a,B</sup> | 6.42±0.04 <sup>b,B</sup><br>(-19%) | 5.89±0.05 <sup>c,B</sup><br>(-26%) | 6.06±0.08 <sup>d,B</sup><br>(-24%) |
| CA                      | 21.4±0.5 <sup>a,A</sup>  | 16.8±0.2 <sup>b,A</sup><br>(-21%)  | 15.0±0.3 <sup>c,A</sup><br>(-30%)  | 15.8±0.5 <sup>d,A</sup><br>(-26%)  | 34.4±0.3 <sup>a,B</sup>  | 28.2±1.2 <sup>b,B</sup><br>(-18%)  | 25.4±0.2 <sup>c,B</sup><br>(-26%)  | 26.4±0.3 <sup>d,B</sup><br>(-23%)  |
| <i>p</i> -CoA           | 17.9±0.2 <sup>a,A</sup>  | 14.9±0.4 <sup>b,A</sup><br>(-17%)  | 13.3±0.2 <sup>c,A</sup><br>(-26%)  | 14.0±0.4 <sup>d,A</sup><br>(-22%)  | 4.23±0.11 <sup>a,B</sup> | 3.28±0.06 <sup>b,B</sup><br>(-22%) | 2.94±0.07 <sup>c,B</sup><br>(-30%) | 3.08±0.11 <sup>d,B</sup><br>(-27%) |
| SA                      | 28.9±0.4 <sup>a,A</sup>  | 24.2±0.2 <sup>b,A</sup><br>(-16%)  | 22.4±0.3 <sup>c,A</sup><br>(-22%)  | 23.1±0.4 <sup>d,A</sup><br>(-20%)  | 40.3±0.6 <sup>a,B</sup>  | 31.7±0.4 <sup>b,B</sup><br>(-21%)  | 29.7±0.5 <sup>c,B</sup><br>(-26%)  | 30.4±0.7 <sup>d,B</sup><br>(-25%)  |
| EA                      | 4.93±0.14 <sup>a,A</sup> | 4.00±0.09 <sup>b,A</sup>           | 3.66±0.11 <sup>c,A</sup>           | 3.79±0.13 <sup>d,A</sup>           | 5.06±0.13 <sup>a,B</sup> | 3.95±0.21 <sup>b,A</sup>           | 3.54±0.16 <sup>c,B</sup>           | 3.69±0.13 <sup>d,B</sup>           |

---

| (-19%)                                                                                                                                                                                                                                                                                                                                                                                                                                                                                                                                                                                                                                                                                                                                                                                                                                                               | (-26%) | (-23%) | (-22%) | (-30%) | (-27%) |
|----------------------------------------------------------------------------------------------------------------------------------------------------------------------------------------------------------------------------------------------------------------------------------------------------------------------------------------------------------------------------------------------------------------------------------------------------------------------------------------------------------------------------------------------------------------------------------------------------------------------------------------------------------------------------------------------------------------------------------------------------------------------------------------------------------------------------------------------------------------------|--------|--------|--------|--------|--------|
| <p>The results are presented as means in dry matter <math>\pm</math> SD, n=5 (the mean of five measurements). For each variable and effect, values followed with different letters are significantly different at <math>p&lt;0.05</math>. The percentage decreases in the values of total phenolics for individual storage conditions are presented in parentheses. E (epicatechin), C (catechin), R (rutin), Q (quercetin), NA (neochlorogenic acid), GA (gallic acid), PA (protocatechuic acid), <i>p</i>-OH-BA (<i>p</i>-hydroxybenzoic acid), CA (caffeic acid), <i>p</i>-CoA (<i>p</i>-coumaric acid), SA (sinapic acid), EA (ellagic acid), S (start of storage experiment), D (storage condition without the presence of sunlight at 23 °C), L (storage condition in the presence of sunlight at 23 °C), T (storage in the thermostatic device at 40 °C).</p> |        |        |        |        |        |

**Table S9.** Total individual phenolic content of the nutraceutical mixtures M3 and M4 under defined storage conditions.

| <b>Total phenolics (mg/kg)</b> | <b>M3S</b>               | <b>M3D</b>                         | <b>M3L</b>                         | <b>M3T</b>                         | <b>M4S</b>               | <b>M4D</b>                         | <b>M4L</b>                         | <b>M4T</b>                         |
|--------------------------------|--------------------------|------------------------------------|------------------------------------|------------------------------------|--------------------------|------------------------------------|------------------------------------|------------------------------------|
| E                              | 254±3 <sup>a,A</sup>     | 215±2 <sup>b,A</sup><br>(-15%)     | 198±2 <sup>c,A</sup><br>(-22%)     | 204±2 <sup>d,A</sup><br>(-20%)     | 169±1 <sup>a,B</sup>     | 140±1 <sup>b,B</sup><br>(-17%)     | 126±1 <sup>c,B</sup><br>(-25%)     | 131±2 <sup>d,B</sup><br>(-22%)     |
| C                              | 195±2 <sup>a,A</sup>     | 157±4 <sup>b,A</sup><br>(-19%)     | 147±2 <sup>c,A</sup><br>(-25%)     | 150±2 <sup>d,A</sup><br>(-23%)     | 130±1 <sup>a,B</sup>     | 100±1 <sup>b,B</sup><br>(-23%)     | 87.3±0.8 <sup>c,B</sup><br>(-33%)  | 92.2±1.1 <sup>d,B</sup><br>(-29%)  |
| R                              | 147±2 <sup>a,A</sup>     | 119±1 <sup>b,A</sup><br>(-19%)     | 105±1 <sup>c,A</sup><br>(-29%)     | 111±1 <sup>d,A</sup><br>(-24%)     | 110±1 <sup>a,B</sup>     | 85.8±0.3 <sup>b,B</sup><br>(-22%)  | 75.6±0.4 <sup>c,B</sup><br>(-31%)  | 79.2±1.3 <sup>d,B</sup><br>(-28%)  |
| Q                              | 2.22±0.08 <sup>a,A</sup> | 1.70±0.02 <sup>b,A</sup><br>(-23%) | 1.34±0.18 <sup>c,A</sup><br>(-40%) | 1.51±0.07 <sup>d,A</sup><br>(-32%) | 4.14±0.08 <sup>a,B</sup> | 3.22±0.03 <sup>b,B</sup><br>(-22%) | 2.74±0.09 <sup>c,B</sup><br>(-34%) | 2.94±0.08 <sup>d,B</sup><br>(-29%) |
| NA                             | 84.6±0.5 <sup>a,A</sup>  | 64.5±0.4 <sup>b,A</sup><br>(-24%)  | 57.6±0.7 <sup>c,A</sup><br>(-32%)  | 61.0±0.7 <sup>d,A</sup><br>(-28%)  | 118±1 <sup>a,B</sup>     | 95.4±0.6 <sup>b,B</sup><br>(-19%)  | 85.3±0.5 <sup>c,B</sup><br>(-28%)  | 90.2±0.5 <sup>d,B</sup><br>(-24%)  |
| GA                             | 5.42±0.10 <sup>a,A</sup> | 4.32±0.03 <sup>b,A</sup><br>(-20%) | 3.65±0.06 <sup>c,A</sup><br>(-33%) | 4.00±0.09 <sup>d,A</sup><br>(-26%) | 66.8±0.3 <sup>a,B</sup>  | 56.5±0.4 <sup>b,B</sup><br>(-15%)  | 52.2±0.2 <sup>c,B</sup><br>(-22%)  | 53.9±0.6 <sup>d,B</sup><br>(-19%)  |
| PA                             | 208±1 <sup>a,A</sup>     | 160±1 <sup>b,A</sup><br>(-23%)     | 149±1 <sup>c,A</sup><br>(-28%)     | 154±1 <sup>d,A</sup><br>(-26%)     | 185±1 <sup>a,B</sup>     | 144±2 <sup>b,B</sup><br>(-22%)     | 133±1 <sup>c,B</sup><br>(-28%)     | 139±1 <sup>d,B</sup><br>(-25%)     |
| <i>p</i> -OH-BA                | 8.28±0.14 <sup>a,A</sup> | 6.69±0.22 <sup>b,A</sup><br>(-19%) | 6.32±0.10 <sup>c,A</sup><br>(-24%) | 6.51±0.13 <sup>d,A</sup><br>(-21%) | 9.69±0.30 <sup>a,B</sup> | 7.35±0.11 <sup>b,B</sup><br>(-24%) | 6.64±0.07 <sup>c,B</sup><br>(-31%) | 6.91±0.22 <sup>d,B</sup><br>(-29%) |
| CA                             | 33.7±0.3 <sup>a,A</sup>  | 26.5±0.3 <sup>b,A</sup><br>(-21%)  | 23.9±0.1 <sup>c,A</sup><br>(-29%)  | 24.9±0.2 <sup>d,A</sup><br>(-26%)  | 28.6±1.0 <sup>a,B</sup>  | 21.7±0.3 <sup>b,B</sup><br>(-24%)  | 18.9±0.1 <sup>c,B</sup><br>(-34%)  | 20.0±0.1 <sup>d,B</sup><br>(-30%)  |
| <i>p</i> -CoA                  | 4.14±0.11 <sup>a,A</sup> | 3.02±0.21 <sup>b,A</sup><br>(-27%) | 2.72±0.10 <sup>c,A</sup><br>(-34%) | 2.84±0.10 <sup>d,A</sup><br>(-31%) | 1.45±0.05 <sup>a,B</sup> | 1.10±0.05 <sup>b,B</sup><br>(-24%) | 0.89±0.05 <sup>c,B</sup><br>(-39%) | 1.01±0.06 <sup>d,B</sup><br>(-30%) |
| SA                             | 38.0±0.2 <sup>a,A</sup>  | 31.5±0.3 <sup>b,A</sup><br>(-17%)  | 29.1±0.1 <sup>c,A</sup><br>(-23%)  | 30.3±0.2 <sup>d,A</sup><br>(-20%)  | 40.4±0.1 <sup>a,B</sup>  | 32.7±0.1 <sup>b,B</sup><br>(-19%)  | 29.0±0.1 <sup>c,A</sup><br>(-28%)  | 30.7±0.1 <sup>d,B</sup><br>(-24%)  |
| EA                             | 1.87±0.07 <sup>a,A</sup> | 1.41±0.12 <sup>b,A</sup>           | 1.16±0.02 <sup>c,A</sup>           | 1.27±0.06 <sup>d,A</sup>           | 2.41±0.10 <sup>a,B</sup> | 1.81±0.03 <sup>b,B</sup>           | 1.68±0.05 <sup>c,B</sup>           | 1.67±0.06 <sup>d,B</sup>           |



---

| (-25%)                                                                                                                                                                                                                                                                                                                                                                                                                                                                                                                                                                                                                                                                                                                                                                                                                                                               | (-38%) | (-32%) | (-25%) | (-30%) | (-31%) |
|----------------------------------------------------------------------------------------------------------------------------------------------------------------------------------------------------------------------------------------------------------------------------------------------------------------------------------------------------------------------------------------------------------------------------------------------------------------------------------------------------------------------------------------------------------------------------------------------------------------------------------------------------------------------------------------------------------------------------------------------------------------------------------------------------------------------------------------------------------------------|--------|--------|--------|--------|--------|
| <p>The results are presented as means in dry matter <math>\pm</math> SD, n=5 (the mean of five measurements). For each variable and effect, values followed with different letters are significantly different at <math>p&lt;0.05</math>. The percentage decreases in the values of total phenolics for individual storage conditions are presented in parentheses. E (epicatechin), C (catechin), R (rutin), Q (quercetin), NA (neochlorogenic acid), GA (gallic acid), PA (protocatechuic acid), <i>p</i>-OH-BA (<i>p</i>-hydroxybenzoic acid), CA (caffeic acid), <i>p</i>-CoA (<i>p</i>-coumaric acid), SA (sinapic acid), EA (ellagic acid), S (start of storage experiment), D (storage condition without the presence of sunlight at 23 °C), L (storage condition in the presence of sunlight at 23 °C), T (storage in the thermostatic device at 40 °C).</p> |        |        |        |        |        |



|                     |         |         |         |         |         |         |         |         |         |        |         |
|---------------------|---------|---------|---------|---------|---------|---------|---------|---------|---------|--------|---------|
| sb-GA               | *       | *       | -0.5083 | -0.7509 | *       | *       | *       | *       | *       | *      | *       |
| ib-GA               | *       | *       | *       | *       | 0.6763  | 0.6307  | *       | *       | *       | *      | *       |
| t-GA                | *       | *       | *       | *       | *       | *       | 0.9701  | 0.8365  | 0.9057  | 0.7923 | 0.9584  |
| f-PA                | 0.2516  | -0.5672 | *       | *       | *       | *       | *       | *       | *       | *      | *       |
| sb-PA               | *       | *       | 0.7548  | -0.5678 | *       | *       | *       | *       | *       | *      | *       |
| ib-PA               | *       | *       | *       | *       | 0.0893  | 0.1237  | *       | *       | *       | *      | *       |
| t-PA                | *       | *       | *       | *       | *       | *       | 0.0547  | -0.2379 | -0.3189 | 0.5624 | -0.0040 |
| f- <i>p</i> -OH-BA  | 0.6653  | 0.6817  | *       | *       | *       | *       | *       | *       | *       | *      | *       |
| sb- <i>p</i> -OH-BA | *       | *       | 0.1540  | 0.5797  | *       | *       | *       | *       | *       | *      | *       |
| ib- <i>p</i> -OH-BA | *       | *       | *       | *       | 0.7563  | 0.6650  | *       | *       | *       | *      | *       |
| t- <i>p</i> -OH-BA  | *       | *       | *       | *       | *       | *       | 0.6119  | 0.8816  | 0.8517  | 0.1697 | 0.6753  |
| f-CA                | 0.7261  | 0.6078  | *       | *       | *       | *       | *       | *       | *       | *      | *       |
| sb-CA               | *       | *       | 0.7796  | -0.3053 | *       | *       | *       | *       | *       | *      | *       |
| ib-CA               | *       | *       | *       | *       | -0.1150 | -0.1266 | *       | *       | *       | *      | *       |
| t-CA                | *       | *       | *       | *       | *       | *       | 0.5527  | 0.7294  | 0.5625  | 0.4848 | 0.5955  |
| f- <i>p</i> -CoA    | -0.7954 | -0.6580 | *       | *       | *       | *       | *       | *       | *       | *      | *       |
| sb- <i>p</i> -CoA   | *       | *       | 0.3068  | 0.8731  | *       | *       | *       | *       | *       | *      | *       |
| ib- <i>p</i> -CoA   | *       | *       | *       | *       | -0.1357 | -0.1172 | *       | *       | *       | *      | *       |
| t- <i>p</i> -CoA    | *       | *       | *       | *       | *       | *       | -0.6663 | -0.9174 | -0.8457 | 0.5937 | 0.9478  |
| f-SA                | 0.9393  | 0.3135  | *       | *       | *       | *       | *       | *       | *       | *      | *       |
| sb-SA               | *       | *       | -0.4004 | 0.8894  | *       | *       | *       | *       | *       | *      | *       |
| ib-SA               | *       | *       | *       | *       | -0.2870 | -0.2374 | *       | *       | *       | *      | *       |
| t-SA                | *       | *       | *       | *       | *       | *       | 0.7832  | 0.9664  | 0.8967  | 0.4821 | 0.8315  |
| f-EA                | -0.1984 | -0.9725 | *       | *       | *       | *       | *       | *       | *       | *      | *       |
| sb-EA               | *       | *       | -0.8541 | 0.4156  | *       | *       | *       | *       | *       | *      | *       |
| ib-EA               | *       | *       | *       | *       | 0.3547  | 0.2969  | *       | *       | *       | *      | *       |
| t-EA                | *       | *       | *       | *       | *       | *       | 0.1750  | -0.2513 | -0.1902 | 0.5789 | 0.0922  |

|              |   |   |   |   |   |   |         |         |         |         |         |
|--------------|---|---|---|---|---|---|---------|---------|---------|---------|---------|
| t-TAC        | * | * | * | * | * | * | 0.8798  | 0.7377  | 0.6709  | 0.9691  | 0.8627  |
| D3G          | * | * | * | * | * | * | 0.9954  | 0.8626  | 0.8848  | 0.8927  | 0.9839  |
| C3G          | * | * | * | * | * | * | -0.7867 | -0.8227 | -0.7003 | -0.7676 | -0.8050 |
| C3R          | * | * | * | * | * | * | 0.9565  | 0.9636  | 0.9222  | 0.7930  | 0.9722  |
| P3G          | * | * | * | * | * | * | 0.2192  | 0.2997  | 0.0933  | 0.4240  | 0.2373  |
| Pe3G         | * | * | * | * | * | * | -0.4279 | -0.0534 | -0.2202 | -0.5198 | -0.3600 |
| Delphinidin  | * | * | * | * | * | * | 0.7632  | 0.8230  | 0.6942  | 0.7300  | 0.7859  |
| Cyanidin     | * | * | * | * | * | * | 0.3271  | 0.1196  | 0.3321  | 0.1468  | 0.2917  |
| Pelargonidin | * | * | * | * | * | * | 0.2833  | -0.0986 | -0.1070 | 0.7256  | 0.2106  |
| Peonidin     | * | * | * | * | * | * | 0.7174  | 0.4622  | 0.4090  | 0.9710  | 0.6764  |
| Malvidin     | * | * | * | * | * | * | 0.6097  | 0.7804  | 0.8558  | 0.1122  | 0.6538  |

S (start of the storage experiment), f (free), sb (soluble bound), ib (insoluble bound), TPC (total phenolic content), TAC (total anthocyanin content), E (epicatechin), C (catechin), R (rutin), Q (quercetin), NA (neochlorogenic acid), GA (gallic acid), PA (protocatechuic acid), *p*-OH-BA (*p*-hydroxybenzoic acid), CA (caffeic acid), *p*-CoA (*p*-coumaric acid), SA (sinapic acid), EA (ellagic acid), D3G (delphinidin-3-glucoside), C3G (cyanidin-3-glucoside), C3R (cyanidin-3-rutinoside), P3G (pelargonidin-3-glucoside), Pe3G (peonidin-3-glucoside).

**Table S11.** Relations of several evaluation parameters of the nutraceutical mixtures with edible flowers evaluated under the storage conditions at 23 °C and without the presence of sunlight.

| D      | f-ABTS  | f-DPPH  | sb-ABTS | sb-DPPH | ib-ABTS | ib-DPPH | t-ABTS  | t-DPPH  | ACW     | ACL     | IAC     |
|--------|---------|---------|---------|---------|---------|---------|---------|---------|---------|---------|---------|
| f-TPC  | 0.9412  | 0.9790  | *       | *       | *       | *       | *       | *       | *       | *       | *       |
| sb-TPC | *       | *       | -0.8990 | 0.4423  | *       | *       | *       | *       | *       | *       | *       |
| ib-TPC | *       | *       | *       | *       | 0.7040  | 0.7585  | *       | *       | *       | *       | *       |
| t-TPC  | *       | *       | *       | *       | *       | *       | 0.4781  | 0.8738  | 0.7281  | -0.0268 | 0.5084  |
| f-E    | -0.8731 | -0.9926 | *       | *       | *       | *       | *       | *       | *       | *       | *       |
| sb-E   | *       | *       | 0.8362  | -0.0677 | *       | *       | *       | *       | *       | *       | *       |
| ib-E   | *       | *       | *       | *       | 0.2373  | 0.2361  | *       | *       | *       | *       | *       |
| t-E    | *       | *       | *       | *       | *       | *       | -0.1339 | -0.8047 | -0.5276 | 0.3530  | -0.2365 |
| f-C    | 0.2058  | 0.3413  | *       | *       | *       | *       | *       | *       | *       | *       | *       |
| sb-C   | *       | *       | 0.1922  | 0.9438  | *       | *       | *       | *       | *       | *       | *       |
| ib-C   | *       | *       | *       | *       | -0.0218 | 0.0425  | *       | *       | *       | *       | *       |
| t-C    | *       | *       | *       | *       | *       | *       | -0.4989 | -0.0310 | -0.2543 | -0.5316 | -0.3917 |
| f-R    | 0.3922  | 0.5037  | *       | *       | *       | *       | *       | *       | *       | *       | *       |
| sb-R   | *       | *       | -0.0550 | 0.7372  | *       | *       | *       | *       | *       | *       | *       |
| ib-R   | *       | *       | *       | *       | 0.0735  | 0.3003  | *       | *       | *       | *       | *       |
| t-R    | *       | *       | *       | *       | *       | *       | 0.2113  | 0.5048  | 0.4225  | 0.0594  | 0.3264  |
| f-Q    | 0.8601  | 0.5888  | *       | *       | *       | *       | *       | *       | *       | *       | *       |
| sb-Q   | *       | *       | 0.5137  | 0.5643  | *       | *       | *       | *       | *       | *       | *       |
| ib-Q   | *       | *       | *       | *       | 0.9302  | 0.8429  | *       | *       | *       | *       | *       |
| t-Q    | *       | *       | *       | *       | *       | *       | 0.7643  | 0.2319  | 0.5147  | 0.7836  | 0.6780  |
| f-NA   | -0.3838 | -0.6537 | *       | *       | *       | *       | *       | *       | *       | *       | *       |
| sb-NA  | *       | *       | 0.1577  | 0.4563  | *       | *       | *       | *       | *       | *       | *       |
| ib-NA  | *       | *       | *       | *       | 0.6808  | 0.5752  | *       | *       | *       | *       | *       |
| t-NA   | *       | *       | *       | *       | *       | *       | 0.0623  | 0.3980  | 0.2287  | -0.3150 | 0.0368  |

|                     |         |         |         |         |         |         |        |         |         |        |         |
|---------------------|---------|---------|---------|---------|---------|---------|--------|---------|---------|--------|---------|
| f-GA                | 0.8232  | 0.4785  | *       | *       | *       | *       | *      | *       | *       | *      | *       |
| sb-GA               | *       | *       | -0.4892 | -0.7516 | *       | *       | *      | *       | *       | *      | *       |
| ib-GA               | *       | *       | *       | *       | 0.6615  | 0.5590  | *      | *       | *       | *      | *       |
| t-GA                | *       | *       | *       | *       | *       | *       | 0.9668 | 0.8304  | 0.9704  | 0.7003 | 0.9708  |
| f-PA                | 0.4842  | -0.0137 | *       | *       | *       | *       | *      | *       | *       | *      | *       |
| sb-PA               | *       | *       | 0.7262  | -0.2834 | *       | *       | *      | *       | *       | *      | *       |
| ib-PA               | *       | *       | *       | *       | 0.0582  | 0.0660  | *      | *       | *       | *      | *       |
| t-PA                | *       | *       | *       | *       | *       | *       | 0.0404 | -0.6951 | -0.3693 | 0.5332 | -0.0517 |
| f- <i>p</i> -OH-BA  | 0.3705  | 0.4480  | *       | *       | *       | *       | *      | *       | *       | *      | *       |
| sb- <i>p</i> -OH-BA | *       | *       | 0.1395  | 0.5518  | *       | *       | *      | *       | *       | *      | *       |
| ib- <i>p</i> -OH-BA | *       | *       | *       | *       | 0.7587  | 0.6099  | *      | *       | *       | *      | *       |
| t- <i>p</i> -OH-BA  | *       | *       | *       | *       | *       | *       | 0.4272 | 0.8426  | 0.7147  | 0.0652 | 0.5368  |
| f-CA                | 0.4963  | 0.5205  | *       | *       | *       | *       | *      | *       | *       | *      | *       |
| sb-CA               | *       | *       | 0.8184  | -0.2481 | *       | *       | *      | *       | *       | *      | *       |
| ib-CA               | *       | *       | *       | *       | -0.0303 | -0.0125 | *      | *       | *       | *      | *       |
| t-CA                | *       | *       | *       | *       | *       | *       | 0.4655 | 0.3622  | 0.4765  | 0.4999 | 0.5401  |
| f- <i>p</i> -CoA    | -0.5602 | -0.7589 | *       | *       | *       | *       | *      | *       | *       | *      | *       |
| sb- <i>p</i> -CoA   | *       | *       | 0.2678  | 0.7633  | *       | *       | *      | *       | *       | *      | *       |
| ib- <i>p</i> -CoA   | *       | *       | *       | *       | -0.0207 | -0.0584 | *      | *       | *       | *      | *       |
| t- <i>p</i> -CoA    | *       | *       | *       | *       | *       | *       | 0.4245 | -0.3248 | 0.0491  | 0.8290 | 0.3648  |
| f-SA                | 0.7826  | 0.9670  | *       | *       | *       | *       | *      | *       | *       | *      | *       |
| sb-SA               | *       | *       | -0.3938 | 0.9025  | *       | *       | *      | *       | *       | *      | *       |
| ib-SA               | *       | *       | *       | *       | -0.2469 | -0.1414 | *      | *       | *       | *      | *       |
| t-SA                | *       | *       | *       | *       | *       | *       | 0.5075 | 0.8222  | 0.7475  | 0.1957 | 0.6121  |
| f-EA                | 0.0030  | -0.4516 | *       | *       | *       | *       | *      | *       | *       | *      | *       |
| sb-EA               | *       | *       | -0.8717 | 0.3922  | *       | *       | *      | *       | *       | *      | *       |
| ib-EA               | *       | *       | *       | *       | 0.3653  | 0.3194  | *      | *       | *       | *      | *       |

|              |   |   |   |   |   |   |         |         |         |         |         |
|--------------|---|---|---|---|---|---|---------|---------|---------|---------|---------|
| t-EA         | * | * | * | * | * | * | 0.3435  | -0.3800 | -0.0472 | 0.6572  | 0.2269  |
| t-TAC        | * | * | * | * | * | * | 0.8904  | 0.3127  | 0.6484  | 0.9958  | 0.8588  |
| D3G          | * | * | * | * | * | * | 0.9853  | 0.6036  | 0.8605  | 0.9164  | 0.9786  |
| C3G          | * | * | * | * | * | * | -0.6496 | -0.5910 | -0.6971 | -0.5666 | -0.7238 |
| C3R          | * | * | * | * | * | * | 0.9897  | 0.6492  | 0.8885  | 0.8912  | 0.9886  |
| P3G          | * | * | * | * | * | * | 0.4834  | 0.0340  | 0.2973  | 0.7308  | 0.5037  |
| Pe3G         | * | * | * | * | * | * | -0.5670 | -0.1408 | -0.3520 | -0.5477 | -0.4678 |
| Delphinidin  | * | * | * | * | * | * | 0.8167  | 0.4232  | 0.6838  | 0.8750  | 0.8366  |
| Cyanidin     | * | * | * | * | * | * | 0.3982  | 0.1657  | 0.2726  | 0.2838  | 0.3060  |
| Pelargonidin | * | * | * | * | * | * | 0.5265  | -0.2505 | 0.1323  | 0.8595  | 0.4358  |
| Peonidin     | * | * | * | * | * | * | *       | *       | *       | *       | *       |
| Malvidin     | * | * | * | * | * | * | 0.8709  | 0.3080  | 0.6205  | 0.9053  | 0.8023  |

D (storage experiment provided at 23 °C without the presence of sunlight), f (free), sb (soluble bound), ib (insoluble bound), TPC (total phenolic content), TAC (total anthocyanin content), E (epicatechin), C (catechin), R (rutin), Q (quercetin), NA (neochlorogenic acid), GA (gallic acid), PA (protocatechuic acid), *p*-OH-BA (*p*-hydroxybenzoic acid), CA (caffeic acid), *p*-CoA (*p*-coumaric acid), SA (sinapic acid), EA (ellagic acid), D3G (delphinidin-3-glucoside), C3G (cyanidin-3-glucoside), C3R (cyanidin-3-rutinoside), P3G (pelargonidin-3-glucoside), Pe3G (peonidin-3-glucoside).





|                     |         |         |         |         |         |         |         |         |         |         |         |
|---------------------|---------|---------|---------|---------|---------|---------|---------|---------|---------|---------|---------|
| sb-GA               | *       | *       | 0.0509  | -0.6437 | *       | *       | *       | *       | *       | *       | *       |
| ib-GA               | *       | *       | *       | *       | 0.6219  | 0.6609  | *       | *       | *       | *       | *       |
| t-GA                | *       | *       | *       | *       | *       | *       | 0.9839  | 0.9543  | 0.9790  | 0.6600  | 0.8430  |
| f-PA                | -0.0242 | -0.3403 | *       | *       | *       | *       | *       | *       | *       | *       | *       |
| sb-PA               | *       | *       | 0.8519  | 0.2784  | *       | *       | *       | *       | *       | *       | *       |
| ib-PA               | *       | *       | *       | *       | 0.0896  | 0.2196  | *       | *       | *       | *       | *       |
| t-PA                | *       | *       | *       | *       | *       | *       | -0.1289 | -0.2450 | -0.3052 | 0.5241  | -0.0140 |
| f- <i>p</i> -OH-BA  | 0.1952  | 0.4817  | *       | *       | *       | *       | *       | *       | *       | *       | *       |
| sb- <i>p</i> -OH-BA | *       | *       | -0.0287 | 0.9347  | *       | *       | *       | *       | *       | *       | *       |
| ib- <i>p</i> -OH-BA | *       | *       | *       | *       | 0.7505  | 0.7207  | *       | *       | *       | *       | *       |
| t- <i>p</i> -OH-BA  | *       | *       | *       | *       | *       | *       | 0.3165  | 0.6464  | 0.6288  | 0.0195  | 0.4509  |
| f-CA                | 0.2578  | 0.4530  | *       | *       | *       | *       | *       | *       | *       | *       | *       |
| sb-CA               | *       | *       | 0.4845  | -0.6735 | *       | *       | *       | *       | *       | *       | *       |
| ib-CA               | *       | *       | *       | *       | -0.0197 | -0.1432 | *       | *       | *       | *       | *       |
| t-CA                | *       | *       | *       | *       | *       | *       | 0.1816  | 0.5713  | 0.4751  | 0.4802  | 0.5190  |
| f- <i>p</i> -CoA    | -0.5696 | -0.8104 | *       | *       | *       | *       | *       | *       | *       | *       | *       |
| sb- <i>p</i> -CoA   | *       | *       | -0.1480 | 0.8156  | *       | *       | *       | *       | *       | *       | *       |
| ib- <i>p</i> -CoA   | *       | *       | *       | *       | 0.1486  | 0.0654  | *       | *       | *       | *       | *       |
| t- <i>p</i> -CoA    | *       | *       | *       | *       | *       | *       | -0.4036 | -0.7207 | -0.7019 | -0.1172 | -0.5402 |
| f-SA                | 0.8436  | 0.9026  | *       | *       | *       | *       | *       | *       | *       | *       | *       |
| sb-SA               | *       | *       | -0.9389 | 0.3411  | *       | *       | *       | *       | *       | *       | *       |
| ib-SA               | *       | *       | *       | *       | -0.1995 | -0.2679 | *       | *       | *       | *       | *       |
| t-SA                | *       | *       | *       | *       | *       | *       | 0.3972  | 0.7500  | 0.7059  | 0.2770  | 0.6043  |
| f-EA                | -0.2639 | -0.6962 | *       | *       | *       | *       | *       | *       | *       | *       | *       |
| sb-EA               | *       | *       | -0.9166 | 0.0827  | *       | *       | *       | *       | *       | *       | *       |
| ib-EA               | *       | *       | *       | *       | 0.4086  | 0.2606  | *       | *       | *       | *       | *       |
| t-EA                | *       | *       | *       | *       | *       | *       | 0.3354  | 0.0472  | 0.0420  | 0.6673  | 0.2872  |

|              |   |   |   |   |   |   |         |         |         |         |         |
|--------------|---|---|---|---|---|---|---------|---------|---------|---------|---------|
| t-TAC        | * | * | * | * | * | * | 0.7582  | 0.7785  | 0.7324  | 0.9924  | 0.8992  |
| D3G          | * | * | * | * | * | * | 0.8631  | 0.9135  | 0.8815  | 0.9284  | 0.9800  |
| C3G          | * | * | * | * | * | * | -0.4561 | -0.7986 | -0.7359 | -0.4923 | -0.7083 |
| C3R          | * | * | * | * | * | * | 0.9086  | 0.9589  | 0.9388  | 0.8701  | 0.9981  |
| P3G          | * | * | * | * | * | * | 0.2266  | 0.5030  | 0.3961  | 0.7402  | 0.5635  |
| Pe3G         | * | * | * | * | * | * | -0.6983 | -0.3317 | -0.3885 | -0.5563 | -0.4899 |
| Delphinidin  | * | * | * | * | * | * | 0.6127  | 0.8230  | 0.7505  | 0.8606  | 0.8607  |
| Cyanidin     | * | * | * | * | * | * | 0.5597  | 0.1409  | 0.2223  | 0.3000  | 0.2740  |
| Pelargonidin | * | * | * | * | * | * | 0.4166  | 0.2992  | 0.2506  | 0.8887  | 0.5192  |
| Peonidin     | * | * | * | * | * | * | *       | *       | *       | *       | *       |
| Malvidin     | * | * | * | * | * | * | 0.7996  | 0.6156  | 0.6129  | 0.9129  | 0.7850  |

L (storage experiment provided at 23 °C in the presence of sunlight), f (free), sb (soluble bound), ib (insoluble bound), TPC (total phenolic content), TAC (total anthocyanin content), E (epicatechin), C (catechin), R (rutin), Q (quercetin), NA (neochlorogenic acid), GA (gallic acid), PA (protocatechuic acid), *p*-OH-BA (*p*-hydroxybenzoic acid), CA (caffeic acid), *p*-CoA (*p*-coumaric acid), SA (sinapic acid), EA (ellagic acid), D3G (delphinidin-3-glucoside), C3G (cyanidin-3-glucoside), C3R (cyanidin-3-rutinoside), P3G (pelargonidin-3-glucoside), Pe3G (peonidin-3-glucoside).



|                     |         |         |         |         |         |         |         |         |         |         |         |
|---------------------|---------|---------|---------|---------|---------|---------|---------|---------|---------|---------|---------|
| sb-GA               | *       | *       | -0.4595 | -0.7483 | *       | *       | *       | *       | *       | *       | *       |
| ib-GA               | *       | *       | *       | *       | 0.6442  | 0.5151  | *       | *       | *       | *       | *       |
| t-GA                | *       | *       | *       | *       | *       | *       | 0.9746  | 0.8580  | 0.9763  | 0.6768  | 0.9435  |
| f-PA                | 0.1550  | 0.6954  | *       | *       | *       | *       | *       | *       | *       | *       | *       |
| sb-PA               | *       | *       | 0.6543  | -0.2903 | *       | *       | *       | *       | *       | *       | *       |
| ib-PA               | *       | *       | *       | *       | 0.1187  | 0.0688  | *       | *       | *       | *       | *       |
| t-PA                | *       | *       | *       | *       | *       | *       | -0.1670 | -0.2877 | -0.2841 | 0.4915  | -0.0260 |
| f- <i>p</i> -OH-BA  | 0.4279  | 0.6253  | *       | *       | *       | *       | *       | *       | *       | *       | *       |
| sb- <i>p</i> -OH-BA | *       | *       | 0.0642  | 0.6699  | *       | *       | *       | *       | *       | *       | *       |
| ib- <i>p</i> -OH-BA | *       | *       | *       | *       | 0.7339  | 0.5767  | *       | *       | *       | *       | *       |
| t- <i>p</i> -OH-BA  | *       | *       | *       | *       | *       | *       | 0.5452  | 0.7622  | 0.6222  | 0.0598  | 0.4683  |
| f-CA                | 0.5136  | 0.7575  | *       | *       | *       | *       | *       | *       | *       | *       | *       |
| sb-CA               | *       | *       | 0.2201  | 0.1009  | *       | *       | *       | *       | *       | *       | *       |
| ib-CA               | *       | *       | *       | *       | -0.0209 | 0.0511  | *       | *       | *       | *       | *       |
| t-CA                | *       | *       | *       | *       | *       | *       | 0.5129  | 0.7460  | 0.5037  | 0.5323  | 0.5548  |
| f- <i>p</i> -CoA    | -0.7010 | -0.6178 | *       | *       | *       | *       | *       | *       | *       | *       | *       |
| sb- <i>p</i> -CoA   | *       | *       | 0.1898  | 0.7955  | *       | *       | *       | *       | *       | *       | *       |
| ib- <i>p</i> -CoA   | *       | *       | *       | *       | 0.0303  | 0.1447  | *       | *       | *       | *       | *       |
| t- <i>p</i> -CoA    | *       | *       | *       | *       | *       | *       | -0.6297 | -0.8318 | -0.6962 | -0.1770 | -0.5636 |
| f-SA                | 0.9161  | 0.6608  | *       | *       | *       | *       | *       | *       | *       | *       | *       |
| sb-SA               | *       | *       | -0.3851 | 0.8968  | *       | *       | *       | *       | *       | *       | *       |
| ib-SA               | *       | *       | *       | *       | -0.2293 | -0.0902 | *       | *       | *       | *       | *       |
| t-SA                | *       | *       | *       | *       | *       | *       | 0.6382  | 0.8522  | 0.6945  | 0.2465  | 0.5877  |
| f-EA                | -0.2423 | 0.0523  | *       | *       | *       | *       | *       | *       | *       | *       | *       |
| sb-EA               | *       | *       | -0.8495 | 0.3942  | *       | *       | *       | *       | *       | *       | *       |
| ib-EA               | *       | *       | *       | *       | 0.3269  | 0.3191  | *       | *       | *       | *       | *       |
| t-EA                | *       | *       | *       | *       | *       | *       | 0.1470  | -0.1172 | 0.0382  | 0.6229  | 0.2515  |

|              |   |   |   |   |   |   |         |         |         |         |         |
|--------------|---|---|---|---|---|---|---------|---------|---------|---------|---------|
| t-TAC        | * | * | * | * | * | * | 0.8150  | 0.7227  | 0.7409  | 0.9971  | 0.8912  |
| D3G          | * | * | * | * | * | * | 0.9557  | 0.8805  | 0.9146  | 0.9227  | 0.9886  |
| C3G          | * | * | * | * | * | * | -0.7305 | -0.9139 | -0.7384 | -0.5784 | -0.7392 |
| C3R          | * | * | * | * | * | * | 0.9775  | 0.9039  | 0.9457  | 0.8864  | 0.9978  |
| P3G          | * | * | * | * | * | * | 0.4731  | 0.6075  | 0.4108  | 0.7644  | 0.5718  |
| Pe3G         | * | * | * | * | * | * | -0.4420 | -0.1066 | -0.3877 | -0.5065 | -0.4592 |
| Delphinidin  | * | * | * | * | * | * | 0.8076  | 0.8658  | 0.7618  | 0.8915  | 0.8687  |
| Cyanidin     | * | * | * | * | * | * | 0.2412  | -0.1049 | 0.2084  | 0.2291  | 0.2302  |
| Pelargonidin | * | * | * | * | * | * | 0.4031  | 0.2339  | 0.2906  | 0.8749  | 0.5241  |
| Peonidin     | * | * | * | * | * | * | *       | *       | *       | *       | *       |
| Malvidin     | * | * | * | * | * | * | 0.7731  | 0.5569  | 0.6996  | 0.9125  | 0.8302  |

T (storage experiment provided in the thermostatic device at 40 °C), f (free), sb (soluble bound), ib (insoluble bound), TPC (total phenolic content), TAC (total anthocyanin content), E (epicatechin), C (catechin), R (rutin), Q (quercetin), NA (neochlorogenic acid), GA (gallic acid), PA (protocatechuic acid), *p*-OH-BA (*p*-hydroxybenzoic acid), CA (caffeic acid), *p*-CoA (*p*-coumaric acid), SA (sinapic acid), EA (ellagic acid), D3G (delphinidin-3-glucoside), C3G (cyanidin-3-glucoside), C3R (cyanidin-3-rutinoside), P3G (pelargonidin-3-glucoside), Pe3G (peonidin-3-glucoside).
